## Investigating the intention to receive the COVID-19 vaccination in Macao: implications for vaccination strategies

1

2 Carolina Oi Lam UNG<sup>1</sup> †, PhD

3 Yuanjia HU<sup>1</sup>, PhD

4 Hao HU<sup>1</sup>, PhD

5 Ying BIAN\*, PhD

6

7 <sup>1</sup> State Key Laboratory of Quality Research in Chinese Medicine, Institute of Chinese Medical  
8 Science, University of Macau, Taipa, Macao SAR, China

9 \* **Correspondence:**

10 Ying BIAN

11 Email: [BianYing@um.edu.mo](mailto:BianYing@um.edu.mo)

12 Address: N22 Research Building, University of Macau, Avenida da Universidade, Taipa, Macao SAR,  
13 China

14 Tel: +853 8822 8537

15

16

17 word count:2980

18

19

20

21

22

23

24 **Keywords: COVID-19, vaccination, intention, strategy, social responsibility**

25

26 **Key Points**

27 **Question:** What is the intention to receive COVID-19 vaccination in Macao and the influencing  
28 factors?

29

30 **Findings:** A cross-sectional study involving 552 respondents found that the intention rate of COVID-  
31 19 vaccination was 62.3% in Macao. Positive predictors of intention included being able to make  
32 arrangement to receive the vaccine, a sense of social responsibility, and an offer of time off from  
33 work after vaccination. Concerns over vaccine safety and relying on online resources for vaccine  
34 information were negative predictors.

35

36 **Meaning:** Intention to receive COVID-19 vaccination is multifactorial requiring multi-component  
37 strategies to promote vaccine uptake.

38

39

40 **Abstract**

41 **Importance:** Understanding the intention of receiving COVID-19 vaccines is important for  
42 informing effective vaccination strategies especially for areas with low incidence.

43  
44 **Objective:** This study aimed to investigate the intention to receive COVID-19 vaccination, identify  
45 the key influencing factors, and determine the most important intention predictors using a  
46 theoretically principled model.

47  
48 **Design, setting, and participants:** This was a cross-sectional online survey study hosted by Survey  
49 Monkey and implemented for 10 days from May 14 2021. People who aged 18 years or above and  
50 had been residing in Macao for 12 months prior to the study were recruited through social media.

51  
52 **Main outcomes and measures:** Intention, the constructs of protection motivation theory (perceived  
53 severity, perceived susceptibility, maladaptive response reward, self-efficacy, response-efficacy, and  
54 response cost), constructs of health belief model (cues to action), social attitude, social norm, past  
55 experience and information seeking behavior, in addition to demographic variables.

56  
57 **Results:** Of the 552 respondents, 79.5% aged between 25 and 54 years old, 59.4% were female, and  
58 88% had a bachelor degree or above. Overall, 62.3% of the respondents indicated their intention  
59 while 19.2% were hesitant and 18.5% did not have any intention. While 67.0% believed COVID-19  
60 infection was life-threatening, only 19.0% thought they were at risk. Control variables such as age,  
61 gender, education level, and having travel plans were significantly correlated with intention.  
62 Significant associations were found between intention and all the measures ( $p < 0.05$ ). The most  
63 important positive predictors of intention were “*being able to make arrangement to receive the*  
64 *vaccine*” ( $\beta = 0.333$ ,  $P < 0.001$ ), “*a sense of social responsibility*” ( $\beta = 0.326$ ,  $P < 0.001$ ), and “*time*  
65 *off from work after vaccination*” ( $\beta = 0.169$ ,  $P < 0.001$ ), whereas “*concerns over vaccine safety*” ( $\beta = -$   
66  $0.124$ ,  $P < 0.001$ ) and “*relying on online resources for vaccine information*” ( $\beta = -0.065$ ,  $P < 0.05$ )  
67 were negative predictors. Perceived severity was not a predictor of intention.

68  
69 **Conclusion and relevance:** Multi-component strategies that address various factors affecting  
70 intention are needed to formulate effective interventions. Health literacy, vaccination convenience,  
71 social responsibility, reasonable incentives and well-informed risk and benefit analysis are  
72 recommended consideration for future vaccination campaigns.

## 73 **Introduction**

74 The impact of COVID-19 pandemic on human health, economy and societal activities is  
75 unprecedented. Health systems continue to endure massive challenges in preventing and managing  
76 the infection with COVID-19 and its variants, and be stretched to deliver effective public health  
77 measures.<sup>1</sup>

78 One of the critical public health interventions to mitigate COVID-19 pandemic at the population  
79 level is for individuals to get vaccinated with COVID-19 vaccines. Since the release of the genetic  
80 sequence of SARS-CoV-2 in January 2020, the R&D activity to develop a vaccine against the disease  
81 has been intense across the globe.<sup>2</sup> As of June 1 2021, at least 102 vaccines were in clinical  
82 development.<sup>3</sup> Evidence about the safety and efficacy of COVID-19 vaccines in preventing  
83 symptomatic and asymptomatic COVID-19 infections, related hospitalizations, severe disease, death,  
84 and protection against variant strains is accumulating.<sup>4,6</sup> Drug regulatory authorities and the World  
85 Health Organization have successively listed a number of new COVID-19 vaccine candidates for  
86 emergency use, and many governments rushed to distribute the vaccines to their people.<sup>7-10</sup>

87  
88 The speedy development, approval and distribution of COVID-19 vaccines, however, do not  
89 necessarily translate into full-range vaccine uptake. As of June 3 2021, only 41.2% of the total  
90 population in the US were fully vaccinated<sup>11</sup>; in China, 723.5 million doses were administered on the  
91 same day<sup>12</sup> but to vaccinate 40% of population by end-July was a speculation<sup>13</sup>. Vaccination rates  
92 also varied largely among other developed countries (40.1% in the UK, 20.1% in Germany, 17.6% in  
93 France, 6.4% in Canada, 3.14% in Japan).<sup>14</sup> Besides availability, accessibility and affordability,  
94 vaccine hesitancy affecting an individual's decision-making process about getting vaccinated is a  
95 critical challenge to national vaccination programs.<sup>15,16</sup> Vaccine hesitancy refers to "*delay in*  
96 *acceptance or refusal of vaccination despite availability of vaccination services*", and a high rate of  
97 hesitancy or a low rate of intention would undermine the level of demand for a vaccine.<sup>15</sup>  
98 Considering the far-reaching goal of 60-75% vaccination rate to achieve herd immunity<sup>17,18</sup>, it is  
99 paramount to have a good understanding of the vaccination intention in order to encourage vaccine  
100 uptake.

101

102 The decision about taking a COVID-19 vaccine is multifactorial and context-specific varying across  
103 people, time, place and vaccines.<sup>15</sup> There is an ongoing need to investigate the factors contributing to  
104 vaccine hesitancy or affecting the intention to get vaccinated against COVID-19. This is particularly

105 important for areas whereby intention may be hampered by low incidence of COVID-19 cases.  
106 Therefore, the aim of this study was to investigate the intention to get vaccinated against COVID-19  
107 and the associations between such intentions and theoretically principled and sociodemographic  
108 factors in Macao.

109

## 110 **Methods**

111 An online, cross-sectional survey method was applied in this study. The project has been approved  
112 by the Panel on Research Ethics of the University of Macau in May 2021 (SSHRE21-APP018-  
113 ICMS). As indicated in the Participant Information Statement, it was assumed that, by completing  
114 and submitting the survey online, participants agreed to take part in the research study. This study  
115 followed the American Association for Public Opinion Research (AAPOR) reporting guideline.

116

117 Macau is a city with a population of around 690,000 over 32.9km<sup>2</sup> ranked one of the most densely  
118 populated places in the world. As of June 6 2021, there were only 51 imported cases in the city all of  
119 whom fully recovered, and no signs of community transmissions.<sup>19</sup> The percentage of population  
120 fully vaccinated was around 10%. The target population in this study was people aged 18 years or  
121 above who had resided in Macao in the past 12 months. A minimum sample size of 384 respondents  
122 would provide a target 5% margin of error for population percentage estimates with a level of 95%  
123 confidence.

124

125 The online questionnaire, hosted by Survey Monkey, was open on from May 14 2021 and closed on  
126 May 23 2021 when no new responses were received for 24 hours. Invitations to participate in the  
127 study were distributed through social media like Facebook and WeChat, and news media social  
128 platform. Given the popularity of the social media among the Macao population and the need to  
129 maintain social distancing, social media and online communication platform was chosen. Simplified-  
130 snowball sampling technique was also used to recruit more people from respondents' contact. The  
131 survey took less than 8 min to complete on average.

132

## 133 **Measures**

134 The design of the questionnaire was informed by (1) the current literature on intention of COVID-19  
135 vaccination<sup>20-22</sup>, (2) the health belief model<sup>23</sup> and the protection motivation theory<sup>24</sup>, and (3) a  
136 clinician involved in the local COVID-19 vaccination campaign. The schematic diagram of the

137 theoretically principled constructs applied to the intention to receive COVID-19 vaccination in this  
138 study is provided in Figure 1.

139

140 (Figure 1. Schematic diagram of theoretically-principled constructs applied to the intention to receive  
141 COVID-19 vaccination)

142 The questionnaire mainly comprised of 2 sections: Section A collect respondents' demographic  
143 information and Section B asked respondents to rate their level of agreement using a 5-point Likert  
144 scale (1=strongly disagree, 2=disagree, 3=not sure, 4=agree, and 5=strongly agree) their intention  
145 and 28 items representing 11 constructs: perceived severity, perceived susceptibility, maladaptive  
146 response rewards, self-efficacy, response-efficacy, response costs, social attitude, social norms, past  
147 experiences, information seeking behavior, and cues for action. At the conclusion of the study,  
148 participants were invited to provide additional feedback via a free-text response box.

149

150 The questionnaire was pilot-tested twice (2 doctors, 2 pharmacists and 2 researchers in Round 1, and  
151 10 individuals in Round 2) following the concepts described by Leavy<sup>25</sup> to assess content validity,  
152 content consistency, and comprehension, defective questions and the time needed to complete.

153

## 154 **Statistical analysis**

155 The data was analyzed using the Statistical Package for Social Sciences (SPSS) version 24 software  
156 for Windows. In addition to descriptive statistics (frequencies, means, and standard deviations),  
157 Pearson chi-square test was used to compare the differences in COVID-19 vaccination intentions  
158 among subgroups, Spearman's rho was used to test the correlation of intention with the variables, and  
159 multiple linear regression analysis to identify predictors of intention. Whenever the P-value is found  
160 to be smaller than 0.05, the association would be considered statistically significant at a confidence  
161 level of 95%.

162

## 163 **Results**

### 164 **Respondents' characteristics and the differences in the intention among subgroups**

165 A total of 552 valid responses were received. As shown in Table 1, 79.5% aged between 25 and 54  
166 years old, 59.4% were female, 74.8% were local residents, 88% had a bachelor degree or above and  
167 64.5% planned to travel in and out of Macao within the next 6 months. In general, the respondents

168 were broadly representative of the population in Macao in terms of age and types of residency, but  
169 the proportion of female and people having higher levels of education were higher than intended.

170

### 171 **Intention to receive COVID-19 vaccination**

172 Overall, 62.3% of the respondents indicated their intention to receive COVID-19 vaccination, while  
173 19.2% were hesitant and 18.5% did not want to get vaccinated at all. The intention rate within each of  
174 the subgroup is shown in Figure 2. According to the Pearson Chi-square test results (Table 1),  
175 statistically significant differences in the intention were observed among the subgroups of age,  
176 gender, residency types, education level, parental status and having plans to travel in and out of  
177 Macao.

178

179 (Figure 2. Intention of getting COVID-19 vaccination among subgroups (%))

180

### 181 **Respondents' perception about the measurements**

182 Descriptive statistics for items assessing factors related to intention are reported in Table 2. The  
183 results of Spearman's rho suggested that almost all of the items were significantly associated with  
184 respondents' level of intention to receive COVID-19 vaccination.

185

186 While respondents rated severity highly (mean=3.82±1.47), the perceived susceptibility was much  
187 lower (mean=2.49±1.24). Regarding maladaptive responses, respondents rated the money they had  
188 to spend on COVID-19 vaccination the least concern (mean=1.72±1.10). The rating for self-efficacy  
189 was high especially about their ability to register for COVID-19 vaccination (mean=4.41±1.02) and  
190 make appropriate arrangements (mean=4.14±1.22). Their ratings on the response-efficacy was  
191 relatively low regarding the effect of reducing symptoms (mean=3.68±1.22). More than one-third of  
192 the respondents believed that it would be likely for them to experience unbearable side effects after  
193 COVID-19 vaccination. In terms of social attitudes, the respondents recognized the effectiveness of  
194 COVID-19 vaccination on the community (mean=4.09±1.06) more than that on their family  
195 (mean=3.88±1.14). The respondents thought highly of getting COVID-19 vaccination as a social  
196 responsibility (mean=3.99±1.17). In terms of the source of information about COVID-19, they relied  
197 mostly on the government (mean=3.68±1.27) and least on family and friends (mean=2.73±1.27).  
198 Regarding cues for action, the respondents rated loosening of travel restrictions as a result of

199 COVID-19 vaccination the highest (mean=3.91±1.30) and financial incentive the lowest  
200 (mean=3.07±1.52).

201

## 202 **Results of multiple linear regressions**

203 All factors found to be significantly associated with intention in Table 1 and 2 were analyzed as the  
204 independent variables, and the intention as the dependent variable. As shown in Table 3, the model  
205 is able to explain 57.9 % of the variance in intention to receive COVID-19 vaccination. In addition to  
206 age, 8 items from 7 constructs were shown to be predictors of intention, including 5 positive  
207 predictors and 3 negative predictors.

208

209 Positive predictors were: (1) “*I am able to make arrangement to get COVID-19 vaccination*” in self-  
210 efficacy ( $\beta = 0.333$ ,  $P < 0.001$ ); (2) “*I consider getting COVID-19 vaccination a social responsibility*”  
211 in social norm ( $\beta = 0.326$ ,  $P < 0.001$ ); (3) “*I might have a stronger intention to take COVID-19*  
212 *vaccination if there is a rewarding system such as time off from work*” in cues to action ( $\beta = 0.169$ ,  $P$   
213  $< 0.001$ ); (4) “*Most people I know would expect me to get COVID-19 vaccination*” ( $\beta = 0.114$ ,  $P =$   
214  $0.000$ ) in social norm; and (5) “*The risk for me to catch COVID-19 is high*” in perceived  
215 susceptibility ( $\beta = 0.076$ ,  $P < 0.05$ ).

216

217 Negative predictors were: (1) “*It is likely that I will have serious side-effects that I cannot bear from*  
218 *COVID-19 vaccination*” in response cost ( $\beta = -0.124$ ,  $P < 0.001$ ); (2) “*If I do not get a COVID-19*  
219 *vaccination, I will not have to worry about the safety of the vaccine*” in maladaptive response reward  
220 ( $\beta = -0.082$ ,  $P < 0.05$ ); and (3) “*I rely on online sources (such as internet, social media) for accurate*  
221 *information about COVID-19 vaccination*” in information seeking behavior ( $\beta = -0.065$ ,  $P < 0.05$ ).

222

## 223 **Discussion**

224 This is one of the few studies that investigated the intention rate of COVID-19 vaccination in areas  
225 with low incidence rate. The intention rate in Macao was 62.3%, and age, gender, type of residency,  
226 education, parental status, and having travel plans exhibited significant correlation with intention.  
227 Importantly, it was also found that the ability to make arrangement to receive the vaccine, a sense of  
228 social responsibility, an offer of time-off from work after vaccination, peer influence, and perceived  
229 susceptibility were predictors of increased intention, while concerns about vaccine safety and seeking  
230 vaccine information from online sources were predictors of decreased intention. Together with age,  
231 these predictors could explain 57.9% of the variance in vaccination intention.



232

233 The intention rate of COVID-19 vaccination in Macao (62.3%) was higher than that reported in Hong  
234 Kong (4.2% to 44.2%)<sup>26,27</sup>, but lower than that reported in China (88.6%-91.9%)<sup>28,29</sup> and other  
235 countries (such as 94.3% in Malaysia<sup>30</sup>, 75.8% in Australia<sup>31</sup> and 67.9% in Singapore<sup>32</sup>). These  
236 intention rates indicated that hesitancy and refusal about COVID-19 vaccines is a common challenge  
237 impeding the vaccine uptake across the populations.<sup>33</sup> This is especially concerning for Macao  
238 considering that the low vaccination rate (around 10%) and the slow uptake since vaccination was  
239 launched in February 2021, exposing the vulnerability of the city against the spread of the virus..

240

### 241 *1. Improve health literacy to counteract the negative effect of low education background*

242 Consistent with previous findings<sup>34,35</sup>, respondents with lower education level indicated lower  
243 vaccination intention. On this note, the association between lower education level and poorer health  
244 was repeatedly reported<sup>36</sup> and the mechanism behind the association could be explained by the  
245 concept of health literacy, presenting an opportunity for intervention.<sup>37</sup> Future vaccine  
246 communication strategies should consider the level of health literacy in subpopulations when  
247 considering the content and means of the promotion activities.<sup>32</sup> Decreasing the complexity in  
248 communication and information processing, using infographic along with detailed information,  
249 streamlining the COVID-19 vaccination process, and involving healthcare professionals in improving  
250 public health literacy may help to mitigate the impact associated with low education level.<sup>38,39</sup>

251

### 252 *2. Mitigate the false sense of “safety zone”*

253 The correlation between not having travel plans and low vaccination intention was less reported in  
254 previous studies. Due to effective border control and low incidence rate in Macao, non-travelers  
255 generally felt “remote” from COVID-19 pandemic and thus perceived a low level of susceptibility  
256 despite high perceived severity affecting their intention to receive vaccination. This is worrying  
257 because for a completely naive population, a pathogen can easily spread among susceptible hosts in a  
258 rampant manner when there is sufficient exposure of susceptible hosts to infected individuals.<sup>40</sup>  
259 Moreover, it would up to 2 weeks after administration of the second shot to reach the expected  
260 efficacy. Educating the public that the risks of infection would increase with the pace back to  
261 “normality” and the time lag between vaccine administration and optimal protection is crucial to help  
262 them decide about taking preventative actions in a timely manner.

263

### 264 *3. Promote the social responsibility in COVID-19 vaccination and make positive action visible*

265 Our model showed that the sense of social responsibility and peer influence could largely explain the  
266 variance in intention. According to the 2012 Global Vaccine Action Plan approved by the WHO,  
267 “*individuals and communities understand the value of vaccines and demand immunization as both*  
268 *their right and responsibility*”.<sup>41</sup> The recognition of individual’s social responsibility should be  
269 strongly promoted within the community to leverage the power of social norm.<sup>42</sup> Empowering  
270 vaccine recipients to share their personal stories and reasons for vaccination, and making positive  
271 decisions visible by, for instance, providing vaccination badges or ribbons have been  
272 recommended.<sup>42,43</sup> Promoting and displaying the development momentum of social norms has been  
273 shown to be a powerful tool to shift public mentality towards health behavior change.<sup>42,43</sup>

274

#### 275 4. *Empower the public by optimizing their self-efficacy*

276 The respondent’s ability to make arrangement to receive COVID-19 vaccine being a strong predictor  
277 reaffirmed previous findings about self-efficacy.<sup>44,45</sup> To better leverage self-efficacy, the convenience  
278 of getting the vaccine could be enhanced. At present, mass vaccination sites have been employed to  
279 allow high throughput, and tailored vaccine-administration software systems enabled user-  
280 friendliness in making prior booking and onsite enrolment.<sup>46</sup> Group-based, out-reach vaccination  
281 sites (e.g. corporate and universities) to reach people in their communities were also initiated. To  
282 bring vaccination services to the neighborhood, mobile vaccination trucks may be employed in future  
283 campaigns.<sup>47</sup> Importantly, the “customer journey” should also be reviewed and streamlined  
284 consistently to promote vaccine recipient’s pleasant experiences. Increasing vaccination capacity to  
285 cater for increased vaccine demand, onsite registration and appointment rescheduling, as well as  
286 reminding system for the second dose and follow-up for no-shows should also be considered.<sup>48</sup>

287

#### 288 5. *Prioritize vaccination incentives (vaccination certificates and time off work, and money?)*

289 Most people agreed that they would be more willing to receive COVID-19 vaccination should there  
290 be incentives, and preferred easing travel restrictions with vaccination and time off work over  
291 monetary incentives. Incentivizing individuals with vaccination certificates is crucial for social good,  
292 and the implications for the “recovery” of economic and socially activities are profound. Regarding  
293 time-off from work after vaccination, people might experience such side effects as fever, tiredness  
294 and muscle pain which might last for about 1-2 days.<sup>49</sup> As such, as the US-CDC recommended, it is  
295 important for employers to take strategies that appropriately help their employees to manage side  
296 effects after vaccination. In contrast, the evidence about monetary incentives in changing health  
297 behavior is mixed.<sup>50,51</sup> Moreover, it is difficult to determine the amount of money sufficient enough

298 to drive people's decision about vaccination at a population level, and yet such action would be  
299 highly resource consuming of which effectiveness remained questionable.<sup>52</sup>

300

#### 301 6. *Educate the public about scientific-based risk and benefit analysis about COVID-19 vaccines*

302 Concerns about vaccine safety and seeking COVID-19 vaccine information from internet were found  
303 to be negative predictors of COVID-19 vaccination as reported previously.<sup>53,54</sup> Misinformation  
304 regarding the vaccine safety and lack of advanced vaccination knowledge can easily contribute to  
305 anxiety, leading to overestimating possible side effects.<sup>55,56</sup> On this note, there is a need for  
306 transparency and to answer concerns about the speedy development and safety of COVID-19  
307 vaccines.<sup>57</sup> Proactive surveillance of misinformation should be reinforced. To share clear and  
308 accurate messages to otherwise unreachable population subgroups, the government may partner with  
309 trusted messengers (e.g. respected community-based groups and non-governmental organizations,  
310 opinion leaders).<sup>32</sup> Less than half of the respondents considered healthcare professionals their major  
311 source of vaccine information, which indicated under-utilization of healthcare resources. Rather,  
312 healthcare professionals may be empowered to strengthen their capacity in having  
313 empathetic vaccine conversations, addressing myths, and providing vaccine information tailored to  
314 their patients.<sup>57</sup>

315

#### 316 **LIMITATIONS**

317 This study had a number of limitations. Firstly, using an online platform to invite participants and  
318 operating the survey online might have induced sampling. People with lower information technology  
319 literacy might also be under-represented in this study. By the nature of cross-sectional study, no  
320 causal inferences could be made between the key factors and the intention. There is also the  
321 timeliness to the study findings as people's intention to receive COVID-19 vaccination is bound to  
322 fluctuate with the spread of the virus, new evidence about vaccine safety and efficacy, emergence of  
323 new variants, etc. Lastly, the vaccination intention may be affected by factors not explored in this  
324 study. Follow-up studies to identify influencing factors more comprehensively, and stratified studies  
325 to determine the differences in the impact of such factors on various subgroups would be necessary  
326 for precision vaccination strategy design.

327

#### 328 **CONCLUSION**

329 This study reaffirmed that low intention to receive COVID-19 vaccination is a common challenge in  
330 the combat of the pandemic. Multi-component strategies that address various factors affecting

331 intention are needed to formulate effective interventions. Health literacy, vaccination convenience,  
332 social responsibility, reasonable incentives and well-informed risk and benefit analysis are  
333 recommended consideration for future vaccination campaigns.

334

335 Author Contributions:

336 COLU had full access to all the data in the study and takes responsibility for the integrity of the data  
337 and the accuracy of the data analysis. Concept and design: COLU and BY. Acquisition, analysis, or  
338 interpretation of data: All authors. Drafting of the manuscript: COLU. Critical revision of the  
339 manuscript for important intellectual content: All authors. Statistical analysis: BY. Obtained funding:  
340 COLU, YH.

341

342 Conflict of Interest Disclosures: None reported.

343

344 Funding/Support: The Research Fund of University of Macau (MYRG2019-00038-ICMS)

345

346 Role of the Funder/Sponsor: The funders had no role in the design and conduct of the study;  
347 collection, management, analysis, and interpretation of the data; preparation, review, or approval of  
348 the manuscript; and decision to submit the manuscript for publication.

349

350

351

352

353

354

355

356

357

358

359

360

361

362

363

364  
365  
366  
367

**Table 1: Respondents' demographic information (n=552)**

| Demographic information | Frequency               | %   | Intention to receive COVID-19 vaccination |    |                               |    |                            |     | X <sup>2</sup> | P     |                  |
|-------------------------|-------------------------|-----|-------------------------------------------|----|-------------------------------|----|----------------------------|-----|----------------|-------|------------------|
|                         |                         |     | Negative<br>n=102<br>18.5%                |    | Not decided<br>n=106<br>19.2% |    | Positive<br>n=344<br>62.3% |     |                |       |                  |
|                         |                         |     | n                                         | %  | n                             | %  | n                          | %   |                |       |                  |
| Age<br>(years old)      | 18-24                   | 35  | 6.3%                                      | 9  | 25.7%                         | 3  | 8.6%                       | 23  | 65.7%          | 21.97 | <b>&lt;0.05</b>  |
|                         | 25-34                   | 139 | 25.2%                                     | 34 | 24.5%                         | 25 | 18.0%                      | 80  | 57.6%          |       |                  |
|                         | 35-44                   | 157 | 28.4%                                     | 30 | 19.1%                         | 29 | 18.5%                      | 98  | 62.4%          |       |                  |
|                         | 45-54                   | 143 | 25.9%                                     | 23 | 16.1%                         | 38 | 26.6%                      | 82  | 57.3%          |       |                  |
|                         | 55-64                   | 55  | 10.0%                                     | 5  | 9.1%                          | 6  | 10.9%                      | 44  | 80.0%          |       |                  |
|                         | 65+                     | 23  | 4.2%                                      | 1  | 4.3%                          | 5  | 21.7%                      | 17  | 73.9%          |       |                  |
| Gender                  | Male                    | 224 | 40.6%                                     | 35 | 15.6%                         | 34 | 15.2%                      | 155 | 69.2%          | 7.70  | <b>&lt;0.05</b>  |
|                         | Female                  | 328 | 59.4%                                     | 67 | 20.4%                         | 72 | 22.0%                      | 189 | 57.6%          |       |                  |
| Type of residency       | Macao residents         | 413 | 74.8%                                     | 84 | 20.3%                         | 88 | 21.3%                      | 241 | 58.4%          | 25.88 | <b>&lt;0.001</b> |
|                         | Non-residents (worker)  | 75  | 13.6%                                     | 12 | 16.0%                         | 13 | 17.3%                      | 50  | 66.7%          |       |                  |
|                         | Non-residents (student) | 48  | 8.7%                                      | 2  | 4.2%                          | 2  | 4.2%                       | 44  | 91.7%          |       |                  |
|                         | Non-residents (other)   | 9   | 1.6%                                      | 1  | 11.1%                         | 3  | 33.3%                      | 5   | 55.6%          |       |                  |
|                         | None of the above       | 7   | 1.3%                                      | 3  | 42.9%                         | 0  | 0.0%                       | 4   | 57.1%          |       |                  |
| Marital status          | Married                 | 336 | 60.9%                                     | 55 | 16.4%                         | 70 | 20.8%                      | 211 | 62.8%          | 7.32  | 0.293            |
|                         | Cohabitant              | 25  | 4.5%                                      | 7  | 28.0%                         | 5  | 20.0%                      | 13  | 52.0%          |       |                  |
|                         | Single                  | 171 | 31.0%                                     | 37 | 21.6%                         | 25 | 14.6%                      | 109 | 63.7%          |       |                  |
|                         | Widowed or divorced     | 20  | 3.6%                                      | 3  | 15.0%                         | 6  | 30.0%                      | 11  | 55.0%          |       |                  |

|                                                                         |                              |     |        |    |       |    |       |     |        |       |                  |
|-------------------------------------------------------------------------|------------------------------|-----|--------|----|-------|----|-------|-----|--------|-------|------------------|
| Highest level of education completed                                    | Secondary education or below | 65  | 11.8 % | 11 | 16.9% | 22 | 33.8% | 32  | 49.2%  | 27.67 | <b>&lt;0.001</b> |
|                                                                         | Bachelor degree              | 267 | 48.4 % | 60 | 22.5% | 58 | 21.7% | 149 | 55.8%  |       |                  |
|                                                                         | Master degree or above       | 220 | 39.9 % | 31 | 14.1% | 26 | 11.8% | 163 | 74.1%  |       |                  |
| Benign parent                                                           | No                           | 220 | 39.9 % | 53 | 24.1% | 36 | 16.4% | 131 | 59.5%  | 8.22  | <b>&lt;0.05</b>  |
|                                                                         | Yes                          | 332 | 60.1 % | 49 | 14.8% | 70 | 21.1% | 213 | 64.2%  |       |                  |
| Living status                                                           | Living alone                 | 61  | 11.1 % | 7  | 11.5% | 8  | 13.1% | 46  | 75.4%  | 5.03  | 0.081            |
|                                                                         | Living with other people     | 491 | 88.9 % | 95 | 19.3% | 98 | 20.0% | 298 | 60.7%  |       |                  |
| Estimated number of entries and exits to Macau within the next 6 months | 0                            | 196 | 35.5 % | 45 | 23.0% | 52 | 26.5% | 99  | 50.5%  | 24.91 | <b>&lt;0.05</b>  |
|                                                                         | At least once every 3 months | 199 | 36.1 % | 33 | 16.6% | 34 | 17.1% | 132 | 66.3%  |       |                  |
|                                                                         | At least once a month        | 112 | 20.3 % | 17 | 15.2% | 18 | 16.1% | 77  | 68.8%  |       |                  |
|                                                                         | At least once a week         | 37  | 6.7%   | 7  | 18.9% | 2  | 5.4%  | 28  | 75.7%  |       |                  |
|                                                                         | At least once a day          | 8   | 1.4%   | 0  | 0.0%  | 0  | 0.0%  | 8   | 100.0% |       |                  |

368

369

**Table 2. Measurement of variables and other factors**

|                                                       |                                                                                                          | Mean | Std. Deviation | Frequency         |     |          |     |          |     |       |     |                |     | Association with Intention to get COVID-19 vaccination |        |
|-------------------------------------------------------|----------------------------------------------------------------------------------------------------------|------|----------------|-------------------|-----|----------|-----|----------|-----|-------|-----|----------------|-----|--------------------------------------------------------|--------|
|                                                       |                                                                                                          |      |                | Strongly disagree |     | Disagree |     | Not sure |     | Agree |     | Strongly agree |     | Spearman's rho                                         | P      |
|                                                       |                                                                                                          |      |                | n                 | %   | n        | %   | n        | %   | n     | %   | n              | %   |                                                        |        |
| <b>Dependent variables</b>                            |                                                                                                          |      |                |                   |     |          |     |          |     |       |     |                |     |                                                        |        |
| Intention                                             | <i>I intend to have COVID-19 vaccination.</i>                                                            | 3.83 | 1.41           | 63                | 11% | 39       | 7%  | 106      | 19% | 62    | 11% | 282            | 51% |                                                        |        |
| <b>PMT variables and other factors</b>                |                                                                                                          |      |                |                   |     |          |     |          |     |       |     |                |     |                                                        |        |
| Severity                                              | <i>COVID-19 can be a life-threatening illness.</i>                                                       | 3.82 | 1.47           | 78                | 14% | 39       | 7%  | 68       | 12% | 82    | 15% | 285            | 52% | 0.120                                                  | <0.05  |
| Susceptability                                        | <i>The risk for me to catch COVID-19 is high.</i>                                                        | 2.49 | 1.24           | 146               | 26% | 146      | 26% | 158      | 29% | 48    | 9%  | 54             | 10% | 0.148                                                  | <0.001 |
| Maladaptive response rewards (Cronbach's alpha 0.701) | <i>If I do not get a COVID-19 vaccination, I will not have to worry about the safety of the vaccine.</i> | 2.63 | 1.35           | 154               | 28% | 102      | 18% | 168      | 30% | 50    | 9%  | 78             | 14% | -0.215                                                 | <0.001 |
|                                                       | <i>If I do not get a COVID-19 vaccination, I will not have to spend time getting vaccinated.</i>         | 2.04 | 1.17           | 252               | 46% | 114      | 21% | 131      | 24% | 24    | 4%  | 31             | 6%  | -0.173                                                 | <0.001 |
|                                                       | <i>If I do not get a COVID-19 vaccination, I will not have to spend money getting vaccinated.</i>        | 1.72 | 1.1            | 337               | 61% | 96       | 17% | 78       | 14% | 16    | 3%  | 25             | 5%  | -0.610                                                 | 0.154  |

|                                                       |                                                                                                                   |      |      |    |     |    |     |     |     |     |     |     |     |        |        |
|-------------------------------------------------------|-------------------------------------------------------------------------------------------------------------------|------|------|----|-----|----|-----|-----|-----|-----|-----|-----|-----|--------|--------|
| Self-efficacy<br>(Cronbach's<br>alpha =<br>0.865)     | <i>I am confident about my ability to make an informed decision about COVID-19 vaccination.</i>                   | 4.12 | 1.08 | 19 | 3%  | 25 | 5%  | 99  | 18% | 133 | 24% | 276 | 50% | 0.468  | <0.001 |
|                                                       | <i>I have the necessary information to decide whether to vaccinate against COVID-19 vaccination.</i>              | 4.01 | 1.14 | 26 | 5%  | 32 | 6%  | 105 | 19% | 135 | 24% | 254 | 46% | 0.464  | <0.001 |
|                                                       | <i>I know how to register to get COVID-19 vaccination.</i>                                                        | 4.41 | 1.02 | 23 | 4%  | 11 | 2%  | 47  | 9%  | 109 | 20% | 362 | 66% | 0.442  | <0.001 |
|                                                       | <i>I am able to make arrangement to get COVID-19 vaccination.</i>                                                 | 4.14 | 1.22 | 36 | 7%  | 31 | 6%  | 65  | 12% | 107 | 19% | 313 | 57% | 0.613  | <0.001 |
| Response efficacy<br>(Cronbach's<br>alpha =<br>0.921) | <i>Having a COVID-19 vaccination would help reduce the symptoms if ever I contracted the disease.</i>             | 3.68 | 1.22 | 47 | 9%  | 42 | 8%  | 116 | 21% | 180 | 33% | 167 | 30% | 0.357  | <0.001 |
|                                                       | <i>Having a COVID-19 vaccination would help reduce the severity of symptoms if ever I contracted the disease.</i> | 3.76 | 1.17 | 38 | 7%  | 38 | 7%  | 118 | 21% | 185 | 34% | 173 | 31% | 0.358  | <0.001 |
|                                                       | <i>Having a COVID-19 vaccination would help reduce the risk of death if ever I contracted the disease.</i>        | 3.72 | 1.2  | 43 | 8%  | 42 | 8%  | 114 | 21% | 182 | 33% | 171 | 31% | 0.371  | <0.001 |
| Response cost                                         | <i>It is likely that I will have serious side-effects that I cannot bear from COVID-19 vaccination.</i>           | 3.07 | 1.22 | 71 | 13% | 97 | 18% | 187 | 34% | 116 | 21% | 81  | 15% | -0.235 | <0.001 |
| Social attitudes<br>(Cronbach's<br>alpha =            | <i>Getting COVID-19 vaccination helps to reduce the risk of my family contracting COVID-19.</i>                   | 3.88 | 1.14 | 27 | 5%  | 35 | 6%  | 128 | 23% | 152 | 28% | 210 | 38% | 0.511  | <0.001 |



|                                                                         |                                                                                                                                       |      |      |     |     |    |     |     |     |     |     |     |     |        |                  |
|-------------------------------------------------------------------------|---------------------------------------------------------------------------------------------------------------------------------------|------|------|-----|-----|----|-----|-----|-----|-----|-----|-----|-----|--------|------------------|
| 0.870)                                                                  | <i>Getting COVID-19 vaccination helps to prevent the diffusion of COVID-19 in the community.</i>                                      | 4.09 | 1.06 | 20  | 4%  | 26 | 5%  | 90  | 16% | 166 | 30% | 250 | 45% | 0.510  | <b>&lt;0.001</b> |
| Social norm<br>(Cronbach's<br>alpha =<br>0.725)                         | <i>I consider getting COVID-19 vaccination a social responsibility.</i>                                                               | 3.99 | 1.17 | 28  | 5%  | 31 | 6%  | 119 | 22% | 114 | 21% | 260 | 47% | 0.655  | <b>&lt;0.001</b> |
|                                                                         | <i>People I know have already received COVID-19 vaccination.</i>                                                                      | 4.16 | 1.08 | 18  | 3%  | 30 | 5%  | 86  | 16% | 127 | 23% | 291 | 53% | 0.319  | <b>&lt;0.001</b> |
|                                                                         | <i>Most people I know would expect me to get COVID-19 vaccination.</i>                                                                | 3.47 | 1.28 | 53  | 10% | 65 | 12% | 164 | 30% | 110 | 20% | 160 | 29% | 0.508  | <b>&lt;0.001</b> |
| Past<br>experience                                                      | <i>I have bad experiences with other types of vaccines before.</i>                                                                    | 1.71 | 1.15 | 361 | 65% | 72 | 13% | 65  | 12% | 28  | 5%  | 26  | 5%  | -0.150 | <b>&lt;0.001</b> |
| Information<br>seeking<br>behaviour<br>(Cronbach's<br>alpha =<br>0.673) | <i>I have actively sought information about COVID-19 vaccination.</i>                                                                 | 3.48 | 1.26 | 50  | 9%  | 65 | 12% | 158 | 29% | 128 | 23% | 151 | 27% | 0.379  | <b>&lt;0.001</b> |
|                                                                         | <i>I rely on the government (such as the Health Bureau) for accurate information about COVID-19 vaccination.</i>                      | 3.68 | 1.27 | 50  | 9%  | 43 | 8%  | 132 | 24% | 135 | 24% | 192 | 35% | 0.279  | <b>&lt;0.001</b> |
|                                                                         | <i>I rely on healthcare professionals (such as doctors, pharmacists, nurses) for accurate information about COVID-19 vaccination.</i> | 3.19 | 1.37 | 88  | 16% | 81 | 15% | 150 | 27% | 104 | 19% | 129 | 23% | 0.287  | <b>&lt;0.001</b> |
|                                                                         | <i>I rely on online sources (such as internet, social media) for accurate information about COVID-19 vaccination.</i>                 | 3.68 | 1.15 | 34  | 6%  | 40 | 7%  | 156 | 28% | 161 | 29% | 161 | 29% | 0.147  | <b>&lt;0.001</b> |

|                                                    |                                                                                                                                  |      |      |     |     |     |     |     |     |     |     |     |     |       |                  |
|----------------------------------------------------|----------------------------------------------------------------------------------------------------------------------------------|------|------|-----|-----|-----|-----|-----|-----|-----|-----|-----|-----|-------|------------------|
|                                                    | <i>I rely on my family and friends for accurate information about COVID-19 and COVID-19 vaccination.</i>                         | 2.73 | 1.27 | 123 | 22% | 107 | 19% | 179 | 32% | 82  | 15% | 61  | 11% | 0.085 | <b>&lt;0.05</b>  |
| Facilitating factors<br>(Cronbach's alpha = 0.835) | <i>I might have a stronger intention to take COVID-19 vaccination if people I know have done so.</i>                             | 3.42 | 1.35 | 74  | 13% | 56  | 10% | 143 | 26% | 122 | 22% | 157 | 28% | 0.376 | <b>&lt;0.001</b> |
|                                                    | <i>I might have a stronger intention to take COVID-19 vaccination if that somehow helps to lift travel restrictions.</i>         | 3.91 | 1.3  | 49  | 9%  | 36  | 7%  | 92  | 17% | 115 | 21% | 260 | 47% | 0.423 | <b>&lt;0.001</b> |
|                                                    | <i>I might have a stronger intention to take COVID-19 vaccination if there is a rewarding system such as time off from work.</i> | 3.37 | 1.49 | 102 | 18% | 54  | 10% | 121 | 22% | 86  | 16% | 189 | 34% | 0.358 | <b>&lt;0.001</b> |
|                                                    | <i>I might have a stronger intention to take COVID-19 vaccination if there is financial incentive.</i>                           | 3.07 | 1.52 | 135 | 24% | 62  | 11% | 134 | 24% | 68  | 12% | 153 | 28% | 0.265 | <b>&lt;0.001</b> |

371  
372  
373  
374  
375  
376  
377  
378  
379  
380  
381  
382

383 **Table 3. Results of multiple linear regressions**  
384

| Variables                               |                                                                                                                   | Unstandardized Coefficients |              | Standardized Coefficients Beta | t             | Sig.         |
|-----------------------------------------|-------------------------------------------------------------------------------------------------------------------|-----------------------------|--------------|--------------------------------|---------------|--------------|
|                                         |                                                                                                                   | B                           | Std. Error   |                                |               |              |
| <b>(Constant)</b>                       |                                                                                                                   | <b>0.057</b>                | <b>0.271</b> |                                | <b>0.209</b>  | <b>0.834</b> |
| <b>PMT constructs and other factors</b> |                                                                                                                   |                             |              |                                |               |              |
| Perceived Severity                      | <i>COVID-19 can be a life-threatening illness.</i>                                                                | -.033 <sup>j</sup>          | -1.124       | 0.261                          | -0.048        | 0.911        |
| Perceived susceptibility                | <b><i>The risk for me to catch COVID-19 is high.</i></b>                                                          | <b>0.086</b>                | <b>0.033</b> | <b>0.076</b>                   | <b>2.607</b>  | <b>0.009</b> |
| Maladaptive response rewards            | <b><i>If I do not get a COVID-19 vaccination, I will not have to worry about the safety of the vaccine.</i></b>   | <b>-0.085</b>               | <b>0.030</b> | <b>-0.082</b>                  | <b>-2.808</b> | <b>0.005</b> |
|                                         | <i>If I do not get a COVID-19 vaccination, I will not have to spend time getting vaccinated.</i>                  | -.012 <sup>j</sup>          | -0.374       | 0.708                          | -0.016        | 0.768        |
|                                         | <i>If I do not get a COVID-19 vaccination, I will not have to spend money getting vaccinated.</i>                 | .041 <sup>j</sup>           | 1.386        | 0.166                          | 0.059         | 0.880        |
| Self efficacy                           | <i>I am confident about my ability to make an informed decision about COVID-19 vaccination.</i>                   | .064 <sup>j</sup>           | 1.819        | 0.069                          | 0.078         | 0.631        |
|                                         | <i>I have the necessary information to decide whether to vaccinate against COVID-19 vaccination.</i>              | .051 <sup>j</sup>           | 1.412        | 0.159                          | 0.061         | 0.603        |
|                                         | <i>I know how to register to get COVID-19 vaccination.</i>                                                        | .016 <sup>j</sup>           | 0.403        | 0.687                          | 0.017         | 0.470        |
|                                         | <b><i>I am able to make arrangement to get COVID-19 vaccination.</i></b>                                          | <b>0.386</b>                | <b>0.040</b> | <b>0.333</b>                   | <b>9.666</b>  | <b>0.000</b> |
| Response efficacy                       | <i>Having a COVID-19 vaccination would help reduce the symptoms if ever I contracted the disease.</i>             | -.018 <sup>j</sup>          | -0.541       | 0.589                          | -0.023        | 0.672        |
|                                         | <i>Having a COVID-19 vaccination would help reduce the severity of symptoms if ever I contracted the disease.</i> | -.014 <sup>j</sup>          | -0.429       | 0.668                          | -0.018        | 0.683        |
|                                         | <i>Having a COVID-19 vaccination would help reduce the risk of death if ever I contracted the disease.</i>        | .006 <sup>j</sup>           | 0.192        | 0.848                          | 0.008         | 0.692        |
| Response cost                           | <b><i>It is likely that I will have serious side-effects that I cannot bear from COVID-19 vaccination.</i></b>    | <b>-0.143</b>               | <b>0.035</b> | <b>-0.124</b>                  | <b>-4.139</b> | <b>0.000</b> |
| Social attitudes                        | <i>Getting COVID-19 vaccination helps to reduce the risk of my family contracting COVID-19.</i>                   | .051 <sup>j</sup>           | 1.384        | 0.167                          | 0.059         | 0.564        |
|                                         | <i>Getting COVID-19 vaccination helps to prevent the diffusion of COVID-19 in the community.</i>                  | .003 <sup>j</sup>           | 0.071        | 0.943                          | 0.003         | 0.471        |
| Social norm                             | <b><i>I consider getting COVID-19 vaccination a social responsibility.</i></b>                                    | <b>0.393</b>                | <b>0.044</b> | <b>0.326</b>                   | <b>8.939</b>  | <b>0.000</b> |
|                                         | <i>People I know have been already received COVID-19 vaccination.</i>                                             | .003 <sup>j</sup>           | 0.094        | 0.925                          | 0.004         | 0.648        |

|                                                                     |                                                                                                                                         |                    |              |               |               |              |
|---------------------------------------------------------------------|-----------------------------------------------------------------------------------------------------------------------------------------|--------------------|--------------|---------------|---------------|--------------|
|                                                                     | <b><i>Most people I know would expect me to get COVID-19 vaccination.</i></b>                                                           | <b>0.126</b>       | <b>0.039</b> | <b>0.114</b>  | <b>3.236</b>  | <b>0.001</b> |
| Past experience                                                     | <i>I have had experiences with other types of vaccines before.</i>                                                                      | -.046 <sup>j</sup> | -1.559       | 0.119         | -0.067        | 0.901        |
| Information seeking behaviour                                       | <i>I have actively sought information about COVID-19 vaccination.</i>                                                                   | .040 <sup>j</sup>  | 1.206        | 0.228         | 0.052         | 0.697        |
|                                                                     | <i>I rely on the government (such as the Health Bureau) for accurate information about COVID-19 vaccination.</i>                        | -.018 <sup>j</sup> | -0.594       | 0.553         | -0.026        | 0.810        |
|                                                                     | <i>I rely on healthcare professionals (such as doctors, pharmacists, nurses) for accurate information about COVID-19 vaccination.</i>   | .008 <sup>j</sup>  | 0.262        | 0.793         | 0.011         | 0.834        |
|                                                                     | <b><i>I rely on online sources (such as internet, social media) for accurate information about COVID-19 vaccination.</i></b>            | <b>-0.080</b>      | <b>0.038</b> | <b>-0.065</b> | <b>-2.095</b> | <b>0.037</b> |
|                                                                     | <i>I rely on my family and friends for accurate information about COVID-19 and COVID-19 vaccination.</i>                                | -.006 <sup>j</sup> | -0.196       | 0.845         | -0.008        | 0.865        |
| Facilitating factors                                                | <i>I might have a stronger intention to take COVID-19 vaccination if people I know have done so.</i>                                    | .025 <sup>j</sup>  | 0.691        | 0.490         | 0.030         | 0.591        |
|                                                                     | <i>I might have a stronger intention to take COVID-19 vaccination if that somehow helps to lift travel restrictions.</i>                | -.031 <sup>j</sup> | -0.828       | 0.408         | -0.036        | 0.543        |
|                                                                     | <b><i>I might have a stronger intention to take COVID-19 vaccination if there is a rewarding system such as time off from work.</i></b> | <b>0.160</b>       | <b>0.030</b> | <b>0.169</b>  | <b>5.345</b>  | <b>0.000</b> |
|                                                                     | <i>I might have a stronger intention to take COVID-19 vaccination if there is financial incentive.</i>                                  | .060 <sup>j</sup>  | 1.255        | 0.210         | 0.054         | 0.337        |
| <b>Control variables</b>                                            |                                                                                                                                         |                    |              |               |               |              |
| Age (years old)                                                     |                                                                                                                                         | <b>0.090</b>       | <b>0.034</b> | <b>0.078</b>  | <b>2.627</b>  | <b>0.009</b> |
| Gender                                                              |                                                                                                                                         | -.045 <sup>j</sup> | -1.583       | 0.114         | -0.068        | 0.963        |
| Type of residency                                                   |                                                                                                                                         | .047 <sup>j</sup>  | 1.546        | 0.123         | 0.066         | 0.820        |
| Highest educational level                                           |                                                                                                                                         | .007 <sup>j</sup>  | 0.237        | 0.813         | 0.010         | 0.894        |
| Being a parent                                                      |                                                                                                                                         | .016 <sup>j</sup>  | 0.500        | 0.617         | 0.021         | 0.753        |
| Estimated number of entries and exits to Macau in the next 6 months |                                                                                                                                         | .036 <sup>j</sup>  | 1.249        | 0.212         | 0.054         | 0.914        |

**F =82.923, d.f. = 9, P < 0.001, R = 0.761, R<sup>2</sup> = 0.579, adjusted R<sup>2</sup> = 0.572**

385  
386  
387  
388  
389  
390  
391  
392

393 Figure 1  
394

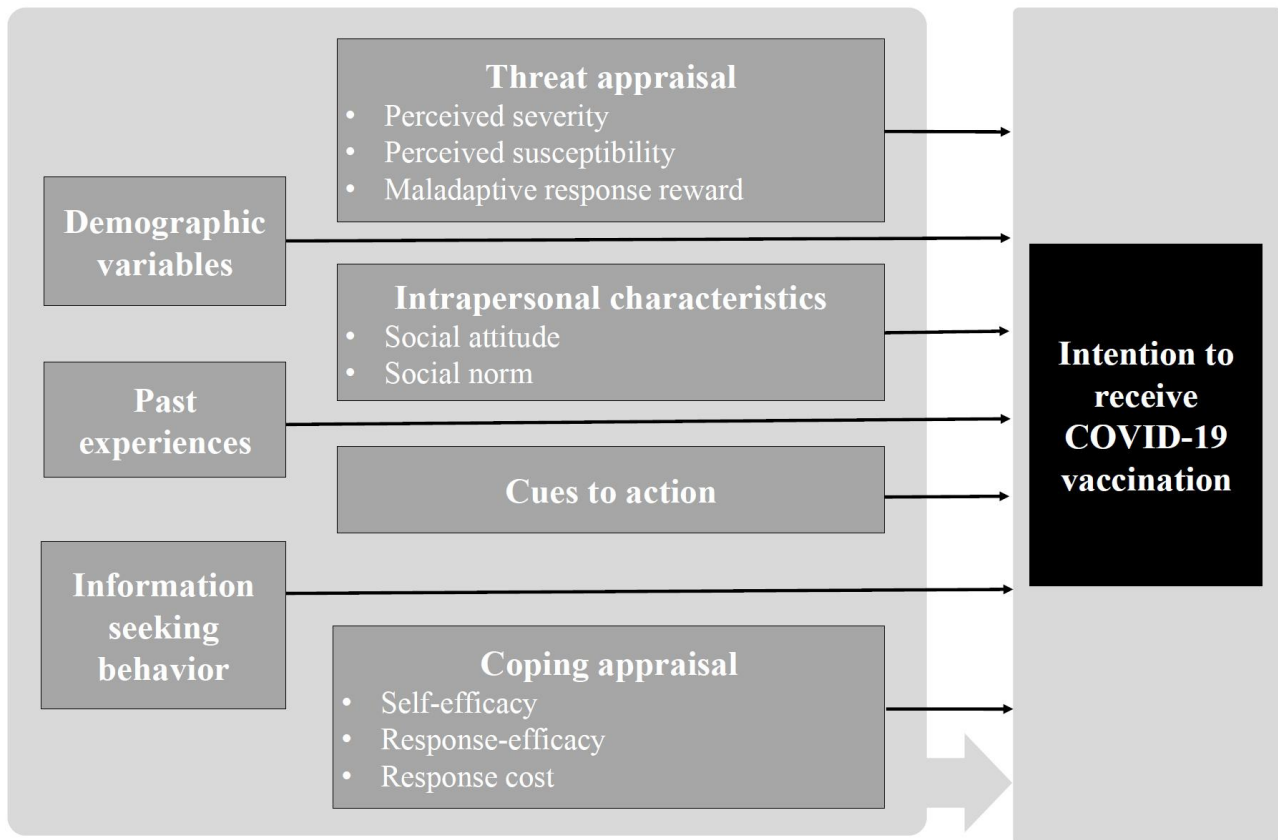

417  
418 **Figure 1. Schematic diagram of theoretically-informed constructs applied to the intention to receive COVID-19 vaccination**  
419

420  
421  
422  
423  
424  
425  
426  
427  
428  
429  
430  
431  
432  
433  
434  
435  
436  
437  
438  
439  
440  
441

442 Figure 2  
 443  
 444  
 445

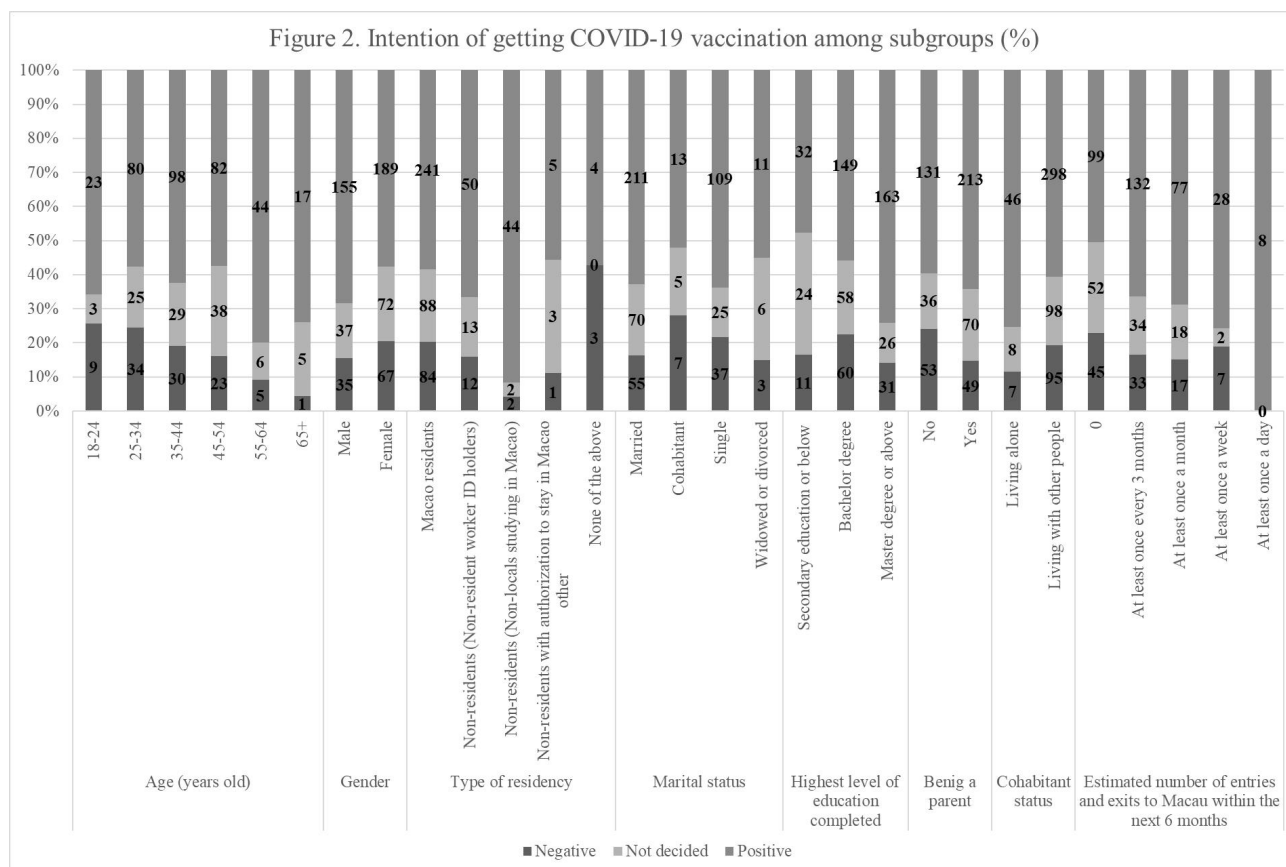

## 490 Reference

- 491 1. World Health Organization. *Strengthening the health system response to COVID-19:*  
492 *technical guidance# 1: maintaining the delivery of essential health care services while*  
493 *mobilizing the health workforce for the COVID-19 response, 18 April 2020.* World Health  
494 Organization. Regional Office for Europe;2020.
- 495 2. Le TT, Andreadakis Z, Kumar A, et al. The COVID-19 vaccine development landscape. *Nat*  
496 *Rev Drug Discov.* 2020;19(5):305-306.
- 497 3. World Health Organization. COVID-19 vaccine tracker and landscape. World Health  
498 Organization. Published 2021. Accessed 2021.06.10, 2021.  
499 <https://www.who.int/publications/m/item/draft-landscape-of-covid-19-candidate-vaccines>.
- 500 4. Al Kaabi N, Zhang Y, Xia S, et al. Effect of 2 Inactivated SARS-CoV-2 Vaccines on  
501 Symptomatic COVID-19 Infection in Adults: A Randomized Clinical Trial. *JAMA*.  
502 2021.doi.10.1001/jama.2021.8565
- 503 5. Livingston EH, Malani PN, Creech CB. The Johnson & Johnson Vaccine for COVID-19.  
504 *JAMA.* 2021;325(15):1575.doi.10.1001/jama.2021.2927
- 505 6. Centers for Disease Control and Prevention. COVID-19 Vaccines and Vaccination.  
506 Published 2021. Accessed 2021.06.10, 2021. [https://www.cdc.gov/coronavirus/2019-](https://www.cdc.gov/coronavirus/2019-ncov/science/science-briefs/fully-vaccinated-people.html)  
507 [ncov/science/science-briefs/fully-vaccinated-people.html](https://www.cdc.gov/coronavirus/2019-ncov/science/science-briefs/fully-vaccinated-people.html).
- 508 7. FDA. COVID-19 Vaccines. Published 2021. Accessed 06.10, 2021.  
509 [https://www.fda.gov/emergency-preparedness-and-response/coronavirus-disease-2019-covid-](https://www.fda.gov/emergency-preparedness-and-response/coronavirus-disease-2019-covid-19/covid-19-vaccines)  
510 [19/covid-19-vaccines](https://www.fda.gov/emergency-preparedness-and-response/coronavirus-disease-2019-covid-19/covid-19-vaccines).
- 511 8. European Medicines Agency. COVID-19 vaccines. Accessed 06.10, 2021.  
512 [https://www.ema.europa.eu/en/human-regulatory/overview/public-health-threats/coronavirus-](https://www.ema.europa.eu/en/human-regulatory/overview/public-health-threats/coronavirus-disease-covid-19/treatments-vaccines/covid-19-vaccines)  
513 [disease-covid-19/treatments-vaccines/covid-19-vaccines](https://www.ema.europa.eu/en/human-regulatory/overview/public-health-threats/coronavirus-disease-covid-19/treatments-vaccines/covid-19-vaccines).
- 514 9. National Medical Products Administration. National Medical Products Administration.  
515 Accessed 06.10, 2021. <https://www.nmpa.gov.cn/>.
- 516 10. World Health Organization. WHO lists additional COVID-19 vaccine for emergency use and  
517 issues interim policy recommendations. Published 2021. Accessed 2021.06.10, 2021.  
518 [https://www.who.int/news/item/07-05-2021-who-lists-additional-covid-19-vaccine-for-](https://www.who.int/news/item/07-05-2021-who-lists-additional-covid-19-vaccine-for-emergency-use-and-issues-interim-policy-recommendations)  
519 [emergency-use-and-issues-interim-policy-recommendations](https://www.who.int/news/item/07-05-2021-who-lists-additional-covid-19-vaccine-for-emergency-use-and-issues-interim-policy-recommendations).

- 520 11. Centers for Disease Control and Prevention. COVID Data Tracker Weekly Review.  
521 Published 2021. Accessed 06.10, 2021. [https://www.cdc.gov/coronavirus/2019-ncov/covid-](https://www.cdc.gov/coronavirus/2019-ncov/covid-data/covidview/index.html)  
522 [data/covidview/index.html](https://www.cdc.gov/coronavirus/2019-ncov/covid-data/covidview/index.html).
- 523 12. Yu S. COVID-19 vaccination status (as of June 2). Published 2021. Accessed 2021.06.10,  
524 2021. [http://www.gov.cn/xinwen/2021-06/03/content\\_5615289.htm](http://www.gov.cn/xinwen/2021-06/03/content_5615289.htm).
- 525 13. Reuters. China aims to vaccinate 40% of population by end-July: senior adviser. Published  
526 2021. Accessed 06.10, 2021. [https://www.reuters.com/article/us-health-coronavirus-china-](https://www.reuters.com/article/us-health-coronavirus-china-vaccine-idUSKBN2AU0J9)  
527 [vaccine-idUSKBN2AU0J9](https://www.reuters.com/article/us-health-coronavirus-china-vaccine-idUSKBN2AU0J9).
- 528 14. Coronavirus Resource Center J. UNDERSTANDING VACCINATION PROGRESS.  
529 Published 2021. Accessed 06.10, 2021. <https://coronavirus.jhu.edu/vaccines/international>.
- 530 15. MacDonald NE. Vaccine hesitancy: Definition, scope and determinants. *Vaccine*.  
531 2015;33(34):4161-4164.
- 532 16. Creech CB, Walker SC, Samuels RJ. SARS-CoV-2 vaccines. *Jama*. 2021;325(13):1318-1320.
- 533 17. Anderson RM, Vegvari C, Truscott J, Collyer BS. Challenges in creating herd immunity to  
534 SARS-CoV-2 infection by mass vaccination. *The Lancet*. 2020;396(10263):1614-1616.
- 535 18. Britton T, Ball F, Trapman P. A mathematical model reveals the influence of population  
536 heterogeneity on herd immunity to SARS-CoV-2. *Science*. 2020;369(6505):846-849.
- 537 19. Centre for Disease Control and Prevention (CDC) Health Bureau. Special Webpage against  
538 Epidemics. Published 2021. Accessed 06.10, 2021.  
539 <https://www.ssm.gov.mo/apps1/PreventCOVID-19/ch.aspx#clg17458>.
- 540 20. Head KJ, Kasting ML, Sturm LA, Hartsock JA, Zimet GD. < covid19 > A National Survey  
541 Assessing SARS-CoV-2 Vaccination Intentions: Implications for Future Public Health  
542 Communication Efforts. *Science Communication*. 2020;42(5):698-723.
- 543 21. Reiter PL, Pennell ML, Katz ML. Acceptability of a COVID-19 vaccine among adults in the  
544 United States: How many people would get vaccinated? *Vaccine*. 2020;38(42):6500-6507.
- 545 22. World Health Organization. Behavioural considerations for acceptance and uptake of  
546 COVID-19 vaccines: WHO technical advisory group on behavioural insights and sciences for  
547 health, meeting report, 15 October 2020. 2020.
- 548 23. Wong MC, Wong EL, Huang J, et al. Acceptance of the COVID-19 vaccine based on the  
549 health belief model: A population-based survey in Hong Kong. *Vaccine*. 2021;39(7):1148-  
550 1156.
- 551 24. Li L, Wang J, Nicholas S, Maitland E, Leng A, Liu R. The Intention to Receive the COVID-  
552 19 Vaccine in China: Insights from Protection Motivation Theory. *Vaccines*. 2021;9(5):445.



- 553 25. Leavy P. Research design: Quantitative, qualitative, mixed methods, arts-based, and  
554 community-based participatory research approaches. 2017.
- 555 26. Wang K, Wong EL-Y, Ho K-F, et al. Change of willingness to accept COVID-19 vaccine and  
556 reasons of vaccine hesitancy of working people at different waves of local epidemic in Hong  
557 Kong, China: Repeated cross-sectional surveys. *Vaccines*. 2021;9(1):62.
- 558 27. Yu Y, Lau JT, Lau M, Wong M, Chan PK. Understanding the prevalence and associated  
559 factors of behavioral intention of COVID-19 vaccination under specific scenarios combining  
560 effectiveness, safety, and cost in the Hong Kong Chinese general population. *International  
561 Journal of Health Policy and Management*. 2021.
- 562 28. Chen M, Li Y, Chen J, et al. An online survey of the attitude and willingness of Chinese  
563 adults to receive COVID-19 vaccination. *Human Vaccines & Immunotherapeutics*. 2021:1-10.
- 564 29. Wang J, Lu X, Lai X, et al. The changing acceptance of COVID-19 vaccination in different  
565 epidemic phases in China: A longitudinal study. *Vaccines*. 2021;9(3):191.
- 566 30. Wong LP, Alias H, Wong P-F, Lee HY, AbuBakar S. The use of the health belief model to  
567 assess predictors of intent to receive the COVID-19 vaccine and willingness to pay. *Human  
568 vaccines & immunotherapeutics*. 2020;16(9):2204-2214.
- 569 31. Rhodes A, Hoq M, Measey M-A, Danchin M. Intention to vaccinate against COVID-19 in  
570 Australia. *The Lancet Infectious Diseases*. 2021;21(5):e110.
- 571 32. Lazarus JV, Ratzan SC, Palayew A, et al. A global survey of potential acceptance of a  
572 COVID-19 vaccine. *Nature medicine*. 2021;27(2):225-228.
- 573 33. Dubé E, Vivion M, MacDonald NE. Vaccine hesitancy, vaccine refusal and the anti-vaccine  
574 movement: influence, impact and implications. *Expert review of vaccines*. 2015;14(1):99-117.
- 575 34. Khubchandani J, Sharma S, Price JH, Wiblishauser MJ, Sharma M, Webb FJ. COVID-19  
576 vaccination hesitancy in the United States: a rapid national assessment. *Journal of Community  
577 Health*. 2021;46(2):270-277.
- 578 35. Dodd RH, Cvejic E, Bonner C, et al. Willingness to vaccinate against COVID-19 in Australia.  
579 *The Lancet Infectious Diseases*. 2021;21(3):318-319.
- 580 36. Kunst AE, Bos V, Lahelma E, et al. Trends in socioeconomic inequalities in self-assessed  
581 health in 10 European countries. *International Journal of Epidemiology*. 2005;34(2):295-305.
- 582 37. Nutbeam D. The evolving concept of health literacy. *Social science & medicine*.  
583 2008;67(12):2072-2078.
- 584 38. Lorini C, Santomauro F, Donzellini M, et al. Health literacy and vaccination: A systematic  
585 review. *Human vaccines & immunotherapeutics*. 2018;14(2):478-488.

- 586 39. Leask J, Kinnersley P, Jackson C, Cheater F, Bedford H, Rowles G. Communicating with  
587 parents about vaccination: a framework for health professionals. *BMC pediatrics*.  
588 2012;12(1):1-11.
- 589 40. Randolph HE, Barreiro LB. Herd immunity: understanding COVID-19. *Immunity*.  
590 2020;52(5):737-741.
- 591 41. World Health Organization. *Global vaccine action plan 2011-2020*. Vol 772013.
- 592 42. Chevallier C, Hacquin A-S, Mercier H. COVID-19 vaccine hesitancy: Shortening the last  
593 mile. *Trends in cognitive sciences*. 2021.
- 594 43. Brewer NT, Chapman GB, Rothman AJ, Leask J, Kempe A. Increasing vaccination: putting  
595 psychological science into action. *Psychological Science in the Public Interest*.  
596 2017;18(3):149-207.
- 597 44. Maddux JE, Rogers RW. Protection motivation and self-efficacy: A revised theory of fear  
598 appeals and attitude change. *Journal of experimental social psychology*. 1983;19(5):469-479.
- 599 45. Britt RK, Hatten KN, Chappuis SO. Perceived behavioral control, intention to get vaccinated,  
600 and usage of online information about the human papillomavirus vaccine. *Health Psychology*  
601 *and Behavioral Medicine: An Open Access Journal*. 2014;2(1):52-65.
- 602 46. Goralnick E, Kaufmann C, Gawande AA. Mass-vaccination sites—an essential innovation to  
603 curb the covid-19 pandemic. *New England Journal of Medicine*. 2021;384(18):e67.
- 604 47. Centers for Disease Control and Prevention. Mobile Vaccination Resources. Published 2021.  
605 Accessed 2021.06.10, 2021. <https://www.cdc.gov/vaccines/covid-19/planning/mobile.html>.
- 606 48. Brown KF, Kroll JS, Hudson MJ, et al. Factors underlying parental decisions about  
607 combination childhood vaccinations including MMR: a systematic review. *Vaccine*.  
608 2010;28(26):4235-4248.
- 609 49. Centers for Disease Control and Prevention. Post Vaccine Considerations for Workplaces.  
610 Published 2021. Accessed 06.10, 2021. [https://www.cdc.gov/coronavirus/2019-  
611 ncov/community/workplaces-businesses/vaccination-considerations-for-workplaces.html](https://www.cdc.gov/coronavirus/2019-ncov/community/workplaces-businesses/vaccination-considerations-for-workplaces.html).
- 612 50. Giles EL, Robalino S, McColl E, Sniehotta FF, Adams J. The effectiveness of financial  
613 incentives for health behaviour change: systematic review and meta-analysis. *PloS one*.  
614 2014;9(3):e90347.
- 615 51. Jarrett C, Wilson R, O’Leary M, Eckersberger E, Larson HJ. Strategies for addressing vaccine  
616 hesitancy—A systematic review. *Vaccine*. 2015;33(34):4180-4190.

- 617 52. Adams J, Giles EL, McColl E, Sniehotta FF. Carrots, sticks and health behaviours: a  
618 framework for documenting the complexity of financial incentive interventions to change  
619 health behaviours. *Health psychology review*. 2014;8(3):286-295.
- 620 53. Tam CC, Qiao S, Li X. Factors associated with decision making on COVID-19 vaccine  
621 acceptance among college students in South Carolina. *medRxiv*. 2020.
- 622 54. Dubé E, MacDonald NE. Vaccine acceptance: barriers, perceived risks, benefits, and  
623 irrational beliefs. In: *The Vaccine Book*. Elsevier; 2016:507-528.
- 624 55. Sallam M, Dababseh D, Eid H, et al. High Rates of COVID-19 Vaccine Hesitancy and Its  
625 Association with Conspiracy Beliefs: A Study in Jordan and Kuwait among Other Arab  
626 Countries. *Vaccines*. 2021;9(1):42.
- 627 56. Karafillakis E, Dinca I, Apfel F, et al. Vaccine hesitancy among healthcare workers in Europe:  
628 A qualitative study. *Vaccine*. 2016;34(41):5013-5020.
- 629 57. Lucia VC, Kelekar A, Afonso NM. COVID-19 vaccine hesitancy among medical students.  
630 *Journal of Public Health*. 2020.
- 631 58. Li J, Hu H, Lui W, et al. Predicting pharmacist intention to contribute to COVID-19  
632 management at community level: a cross-sectional survey study . *Frontiers in Public Health*.  
633 2021.
- 634
